# Supplementary material for: Risk Factors and Prognostic Nomogram for Early-onset Endometrial Cancer: A SEER-Based Analysis
Source: Preprints.org preprint supplement (doi:10.20944/preprints202310.0810.v1), 2023-10-13
Supplement: Supplementary file 1 [file supplementary]

## **Supplementary materials**

Description: Related Computerized Programs for Nomogram with R

### **APPENDIX**

#### **Related computerized programs for nomogram with R for OS nomogram**

```
library(survival)
library(rms)
dd<-datadist(data)
options(datadist="dd")
f<-cph(Surv(time,status) ~ Age+Size+Race+Grade+Tstage+Surgery, data=data,
x=TRUE, y=TRUE, surv=TRUE)
survival<-Survival(f)
Survival1<-function(x)survival(36,x)
Survival2<-function(x)survival(60,x)
nom<-nomogram(f,fun=list(survival1,survival2),fun.at
=c(0.05,seq(0.1,0.9,by=0.1),0.95),funlabel = c('3-year survival','5-year survival'))
plot(nom)
```

#### **For CSS nomogram**

```
library(survival)
library(rms)
dd<-datadist(data)
options(datadist="dd")
f<-cph(Surv(time,CSS) ~ Age+Size+Race+Grade+Tstage+Surgery, data=data,
x=TRUE, y=TRUE, surv=TRUE)
survival<-Survival(f)
Survival1<-function(x)survival(36,x)
Survival2<-function(x)survival(60,x)
nom<-nomogram(f,fun=list(survival1,survival2),fun.at
```

```
= c(0.05,seq(0.1,0.9,by=0.1),0.95),funlabel = c('3-year survival','5-year survival'))
plot(nom)
```

### **For computing the C-index and 95% CI in training cohort and validation cohort**

```
library(survival)
library(rms)
fit<-coxph(Surv(time,status)~Age+Size+Race+Grade+Tstage+Surgery,data =
Ytraindata)
survConcordance(Surv(Ytraindata$time,Ytraindata$status)~predict(fit,Ytraindata))
survConcordance(Surv(Ytestdata$time,Ytestdata$status)~predict(fit,Ytestdata))
```

### **For ROC curve for OS and CSS in training cohort**

```
library(survivalROC)
colnames(seer) <- c("id","survival_time","status","risk_score","predict_time")
predict_time<-12*3
myroc<-survivalROC(Stime=seer$survival_time,status=seer$status,
marker=seer$risk_score, predict.time=predict_time,method="KM")
pdf("ROC_3-year_OS_in_Training_set.pdf")
plot(myroc$FP,myroc$TP,type="l",xlim=c(0,1),ylim=c(0,1),col="blue",
      xlab="FP",ylab="TP",lwd=2.5,main=paste("3-year
Survival","AUC=",round(myroc$AUC,3)))
abline(0,1)
dev.off()
```

```
colnames(seer) <- c("id","survival_time","CSS","risk_score","predict_time")
predict_time<-12*3
myroc<-survivalROC(Stime=seer$survival_time,status=seer$CSS,
marker=seer$risk_score, predict.time=predict_time,method="KM")
pdf("ROC_3-year_CSS_in_Training_set.pdf")
```

```

plot(myroc$FP,myroc$TP,type="l",xlim=c(0,1),ylim=c(0,1),col="red",
      xlab="FP",ylab="TP",lwd=2.5, main=paste("3-year
Survival", "AUC=",round(myroc$AUC,3)))
abline(0,1)
dev.off()

```

### **For ROC curve for OS and CSS in validation cohort**

```

library(survivalROC)
colnames(seer) <- c("id","survival_time","status","risk_score","predict_time")
predict_time<-12*3
myroc<-survivalROC(Stime=seer$survival_time,status=seer$status,
marker=seer$risk_score, predict.time=predict_time,method="KM")
pdf("ROC_3-year_OS_in_Validation_set.pdf")
plot(myroc$FP,myroc$TP,type="l",xlim=c(0,1),ylim=c(0,1),col="blue",
      xlab="FP",ylab="TP",lwd=2.5,main=paste("3-year
Survival", "AUC=",round(myroc$AUC,3)))
abline(0,1)
dev.off()

```

```

colnames(seer) <- c("id","survival_time","CSS","risk_score","predict_time")
predict_time<-12*3
myroc<-survivalROC(Stime=seer$survival_time,status=seer$CSS,
marker=seer$risk_score, predict.time=predict_time,method="KM")
pdf("ROC_3-year_CSS_in_Validation_set.pdf")
plot(myroc$FP,myroc$TP,type="l",xlim=c(0,1),ylim=c(0,1),col="red",
      xlab="FP",ylab="TP",lwd=2.5, main=paste("3-year
Survival", "AUC=",round(myroc$AUC,3)))
abline(0,1)
dev.off()

```

### **For calibration curve for training cohort**

```
library(survival)

library(rms)

f1<-cph(Surv(Ytraindata$time,Ytraindata$status==1)~Age+Size+Race+Grade+Tstage+Surgery,data = Ytraindata,x=TRUE,y=TRUE,surv=TRUE,time.inc=3*12)

cal<-calibrate(f1, cmethod = 'KM', method = "boot", u=3*12, m=180, B=1000)

plot(cal, lwd=1, lty=1, errbar.col=c(rgb(0,0,0,maxColorValue = 255)), xlim = c(0.8,1),
ylim = c(0.7,1), xlab="Nomogram Predicted Survival", ylab="Actual Survival", col=c(rgb(255,0,0, maxColorValue =255)))

abline(0,1,lty = 3, lwd = 2, col = c(rgb(0,118,192,maxColorValue=255)))

lines(cal[,c('mean.predicted','KM')], type = 'b',lwd = 2, col = c(rgb(192,98,83,maxColorValue = 255)), pch = 16)
```

### **For predictions of the validation cohort**

```
library(survival)

library(rms)

f<-cph(Surv(time,status)~Age+Size+Race+Grade+Tstage+Surgery,data = Ytraindata)

f<-predict(f, newdata = Ytestdata)

predictions<-predict(f, newdata = Ytestdata)

predictions
```

### **For calibration curve for validation cohort**

```
f2<-cph(Surv(Ytestdata$time,Ytestdata$status,type = "right")~predictions,
x=T,y=T,surv=T, time.inc =3*12)

validate(f2,method = "boot",B=1000,dxy=T,u=3*12)

cal<-calibrate(f2,cmethod = 'KM',method="boot",u=3*12,m=100,B=1000)

plot(cal,lwd=1,lty=1,errbar.col=c(rgb(0,0,0,maxColorValue = 255)),xlim = c(0.8,1),ylim = c(0.7,1),xlab="Nomogram Predicted Survival ",ylab="Actual Survival",col=c(rgb(255,0,0,maxColorValue =255)))

abline(0,1,lty = 3,lwd = 2,col = c(rgb(0,118,192,maxColorValue=255)))
```

```
lines(cal[,c('mean.predicted','KM')], type = 'b',lwd = 2, col = c(rgb(192,98,83,
maxColorValue = 255)),pch = 16)
```

### **For computing the c-Index and 95% CI of different models for OS**

AJCC TNM stage

```
library(survival)
```

```
library(rms)
```

```
fit1<-coxph(Surv(time,status)~Tstage+Nstage+Mstage,data = Ytraindata)
```

```
survConcordance(Surv(Ytraindata$time,Ytraindata$status)~predict(fit1,Ytraindata))
```

```
survConcordance(Surv(Ytestdata$time,Ytestdata$status)~predict(fit1,Ytestdata))
```

SEER stage

```
library(survival)
```

```
library(rms)
```

```
fit1<-coxph(Surv(time,status)~SEERstage,data = Ytraindata)
```

```
survConcordance(Surv(Ytraindata$time,Ytraindata$status)~predict(fit1,Ytraindata))
```

```
survConcordance(Surv(Ytestdata$time,Ytestdata$status)~predict(fit1,Ytestdata))
```

### **For computing the C-index and 95% CI of different models for CSS**

AJCC TNM stage

```
library(survival)
```

```
library(rms)
```

```
fit1<-coxph(Surv(time,CSS)~Tstage+Nstage+Mstage,data = Ytraindata)
```

```
survConcordance(Surv(Ytraindata$time,Ytraindata$CSS)~predict(fit1,Ytraindata))
```

```
survConcordance(Surv(Ytestdata$time,Ytestdata$CSS)~predict(fit1,Ytestdata))
```

SEER stage

```
library(survival)
```

```
library(rms)
```

```
fit1<-coxph(Surv(time,CSS)~SEERstage,data = Ytraindata)
```

```
survConcordance(Surv(Ytraindata$time,Ytraindata$CSS)~predict(fit1,Ytraindata))
```

```
survConcordance(Surv(Ytestdata$time,Ytestdata$CSS)~predict(fit1,Ytestdata))
```
