# Supplementary material for: Risk Factors and Prognostic Nomogram for Early-onset Endometrial Cancer: A SEER-Based Analysis
Source: Preprints.org preprint supplement (doi:10.20944/preprints202310.0810.v1), 2023-10-13
Supplement: Supplementary file 4 [file supplementary]

Table S1: Baseline characteristics of the training set and the validation set.

| Variables       | All patients<br>n (%) | Training set<br>n (%) | Validation set<br>n (%) | P-value |
|-----------------|-----------------------|-----------------------|-------------------------|---------|
| Age             |                       |                       |                         | 0.591   |
| < 45            | 2338 (53.0)           | 1624 (52.5)           | 714 (54.0)              |         |
| 45-47           | 1083 (24.5)           | 760 (24.6)            | 323 (24.4)              |         |
| > 47            | 994 (22.5)            | 708 (22.9)            | 286 (21.6)              |         |
| Race            |                       |                       |                         | 0.388   |
| White           | 3310 (75.0)           | 2323 (75.1)           | 987 (74.6)              |         |
| Black           | 333 (7.5)             | 241 (7.8)             | 92 (7.0)                |         |
| Other           | 772 (17.5)            | 528 (17.1)            | 244 (18.4)              |         |
| Grade           |                       |                       |                         | 0.765   |
| I               | 2466 (55.9)           | 1735 (56.1)           | 731 (55.3)              |         |
| II              | 1211 (27.4)           | 836 (27.0)            | 375 (28.3)              |         |
| III             | 583 (13.2)            | 411 (13.3)            | 172 (13.0)              |         |
| IV              | 155 (3.5)             | 110 (3.6)             | 45 (3.4)                |         |
| T stage         |                       |                       |                         | 0.469   |
| T1              | 3600 (81.5)           | 2510 (81.2)           | 1090 (82.4)             |         |
| T2              | 324 (7.3)             | 248 (8.0)             | 107 (8.1)               |         |
| T3              | 441 (10.1)            | 296 (9.6)             | 114 (8.6)               |         |
| T4              | 50 (1.1)              | 38 (1.2)              | 12 (0.9)                |         |
| N stage         |                       |                       |                         | 0.533   |
| N0              | 4023 (91.1)           | 2812 (90.9)           | 1211 (91.5)             |         |
| N1              | 237 (5.4)             | 170 (5.5)             | 67 (5.1)                |         |
| N2              | 155 (3.5)             | 110 (3.6)             | 45 (3.4)                |         |
| M stage         |                       |                       |                         | 0.762   |
| M0              | 4232 (95.9)           | 2962 (95.8)           | 1270 (96.0)             |         |
| M1              | 183 (4.1)             | 130 (4.2)             | 53 (4.0)                |         |
| Tumor size (cm) |                       |                       |                         | 0.834   |
| < 3.6           | 1116 (25.3)           | 778 (25.2)            | 338 (25.5)              |         |
| 3.6-7.8         | 3027 (68.5)           | 2124 (68.7)           | 903 (68.3)              |         |
| > 7.8           | 272 (6.2)             | 190 (6.1)             | 82 (6.2)                |         |
| SEER stage      |                       |                       |                         | 0.716   |
| Localized       | 3232 (73.2)           | 2259 (73.1)           | 973 (73.5)              |         |
| Regional        | 978 (22.2)            | 687 (22.2)            | 291 (22.0)              |         |
| Distant         | 205 (4.6)             | 146 (4.7)             | 59 (4.5)                |         |
| Surgery         |                       |                       |                         | 0.595   |
| No              | 70 (1.6)              | 47 (1.5)              | 23 (1.7)                |         |
| Yes             | 4345 (98.4)           | 3045 (98.5)           | 1300 (98.3)             |         |
| Lymphadenectomy |                       |                       |                         | 0.687   |
| No              | 1879 (42.6)           | 1322 (42.8)           | 557 (42.1)              |         |
| Yes             | 2536 (57.4)           | 1770 (57.2)           | 766 (57.9)              |         |
| Radiotherapy    |                       |                       |                         | 0.597   |
| No              | 3509 (79.5)           | 2451 (79.3)           | 1058 (80.0)             |         |
| Yes             | 906 (20.5)            | 641 (20.7)            | 265 (20.0)              |         |
| Chemotherapy    |                       |                       |                         | 0.644   |
| No              | 3546 (80.3)           | 2489 (80.5)           | 1057 (79.9)             |         |
| Yes             | 869 (19.7)            | 603 (19.5)            | 266 (20.1)              |         |
